# Supplementary material
Source: PubMed Central journal article supplement (PMC3934667)
Supplement: Supp_Figure1.pdf [file Supp_Figure1.pdf]

## SUPPLEMENTARY DATA

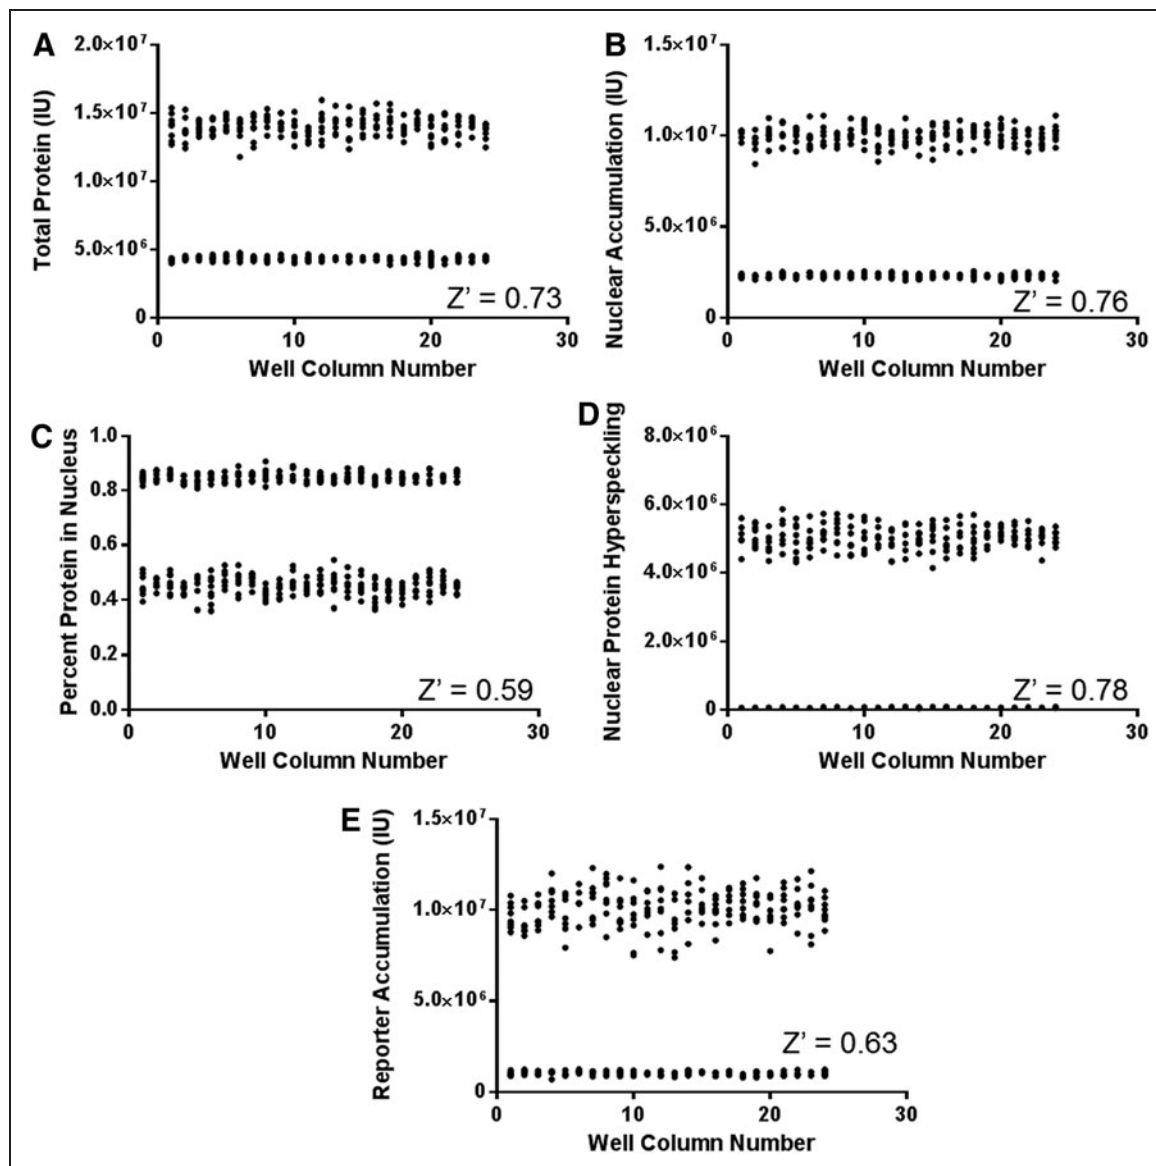

**Supplementary Fig. S1.** mIA transcription factor analysis pipeline. HeLa cells stably expressing GFP-AR and containing an integrated AR responsive promoter were treated with either 10 nM DHT or DMSO for 48 h. A total of 192 wells were used for each treatment condition. Metrics examined were (A) total AR protein level, (B) nuclear AR accumulation, (C) percent of AR in the nucleus, (D) nuclear AR hyperspeckling, and (E) reporter accumulation. AR, androgen receptor; DHT, dihydrotestosterone; DMSO, dimethyl sulfoxide; GFP, green fluorescent protein; mIA, myImageAnalysis.
